# Supplementary material
Source: PubMed Central journal article supplement (PMC2665918)

Figure S1

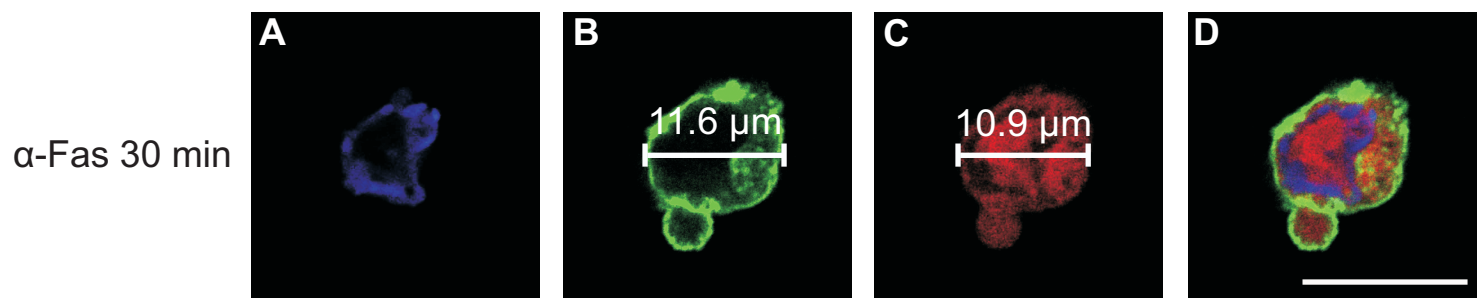

Supplement: NIHMS95263-supplement-Fig_S1.pdf [file NIHMS95263-supplement-Fig_S1.pdf]

Figure S2

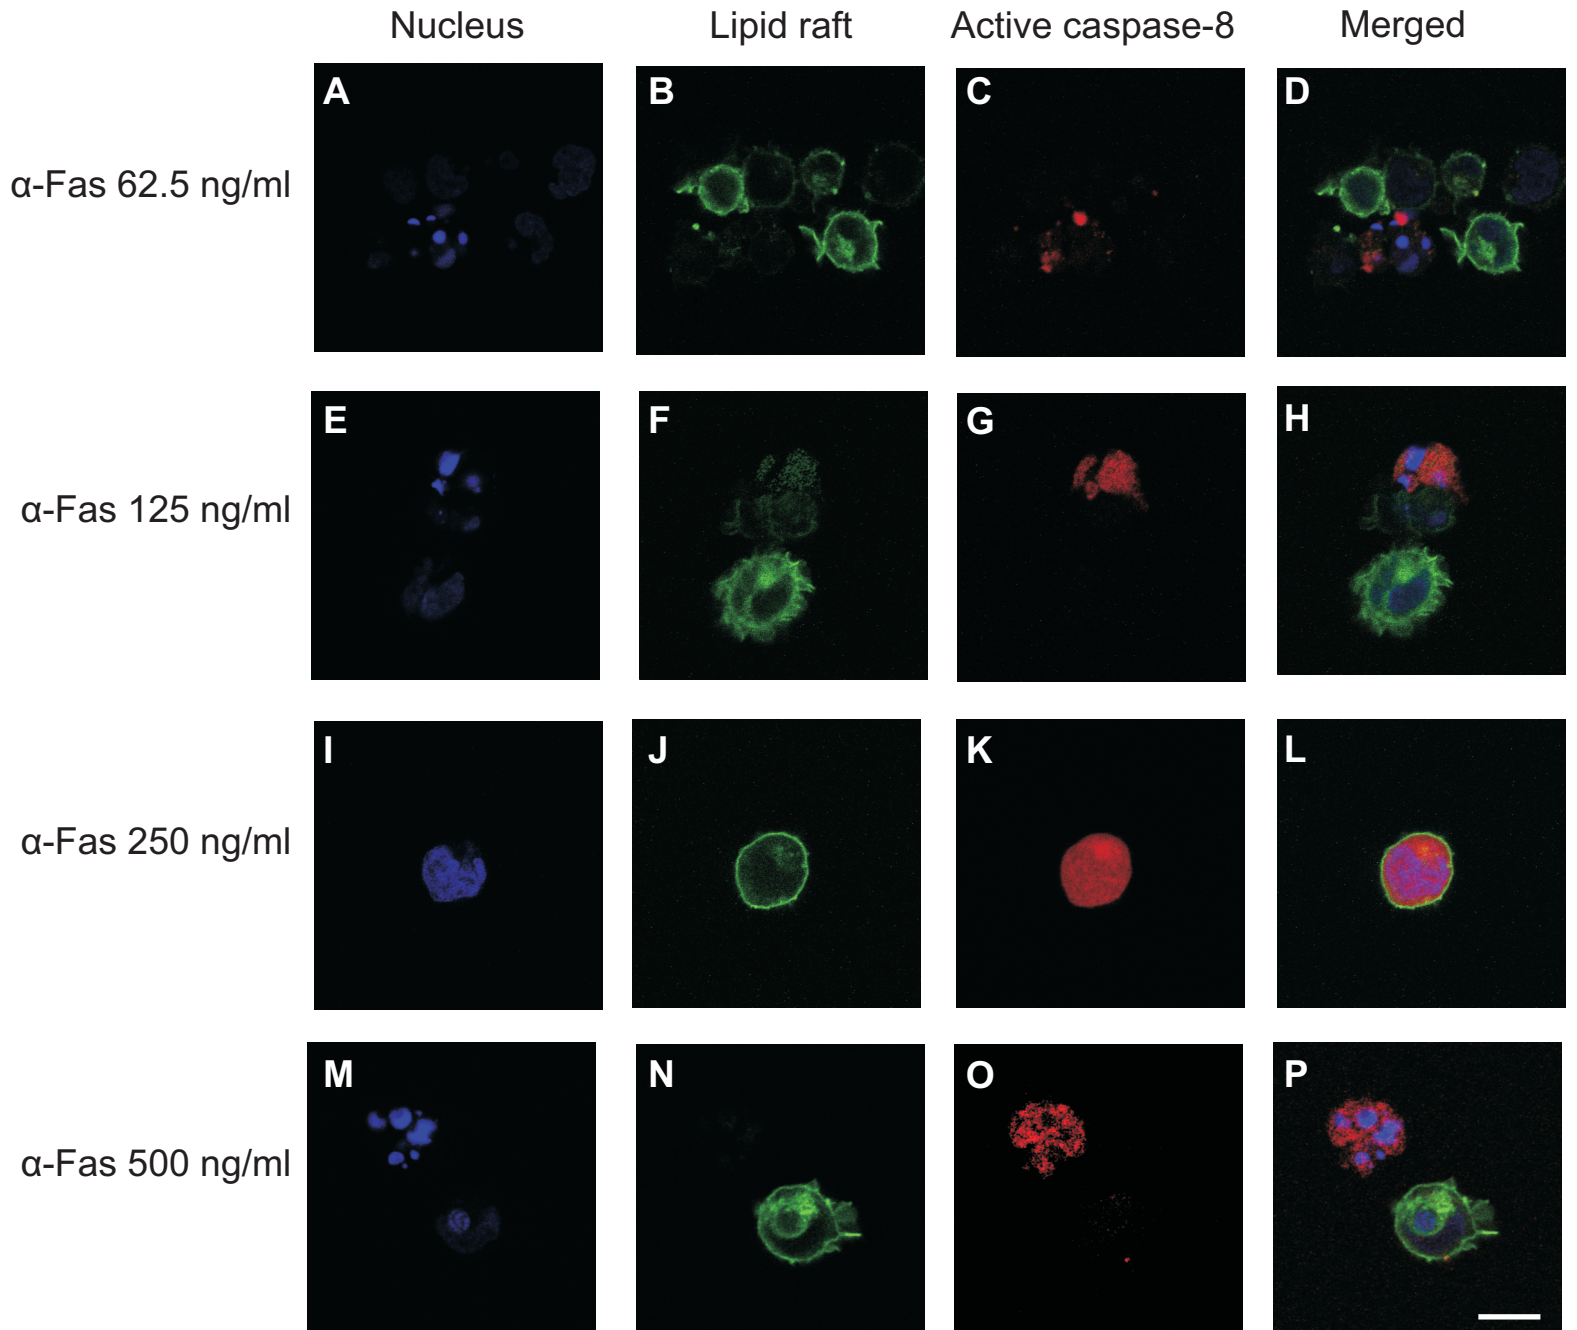

Supplement: NIHMS95263-supplement-Fig_S2.pdf [file NIHMS95263-supplement-Fig_S2.pdf]

Figure S3

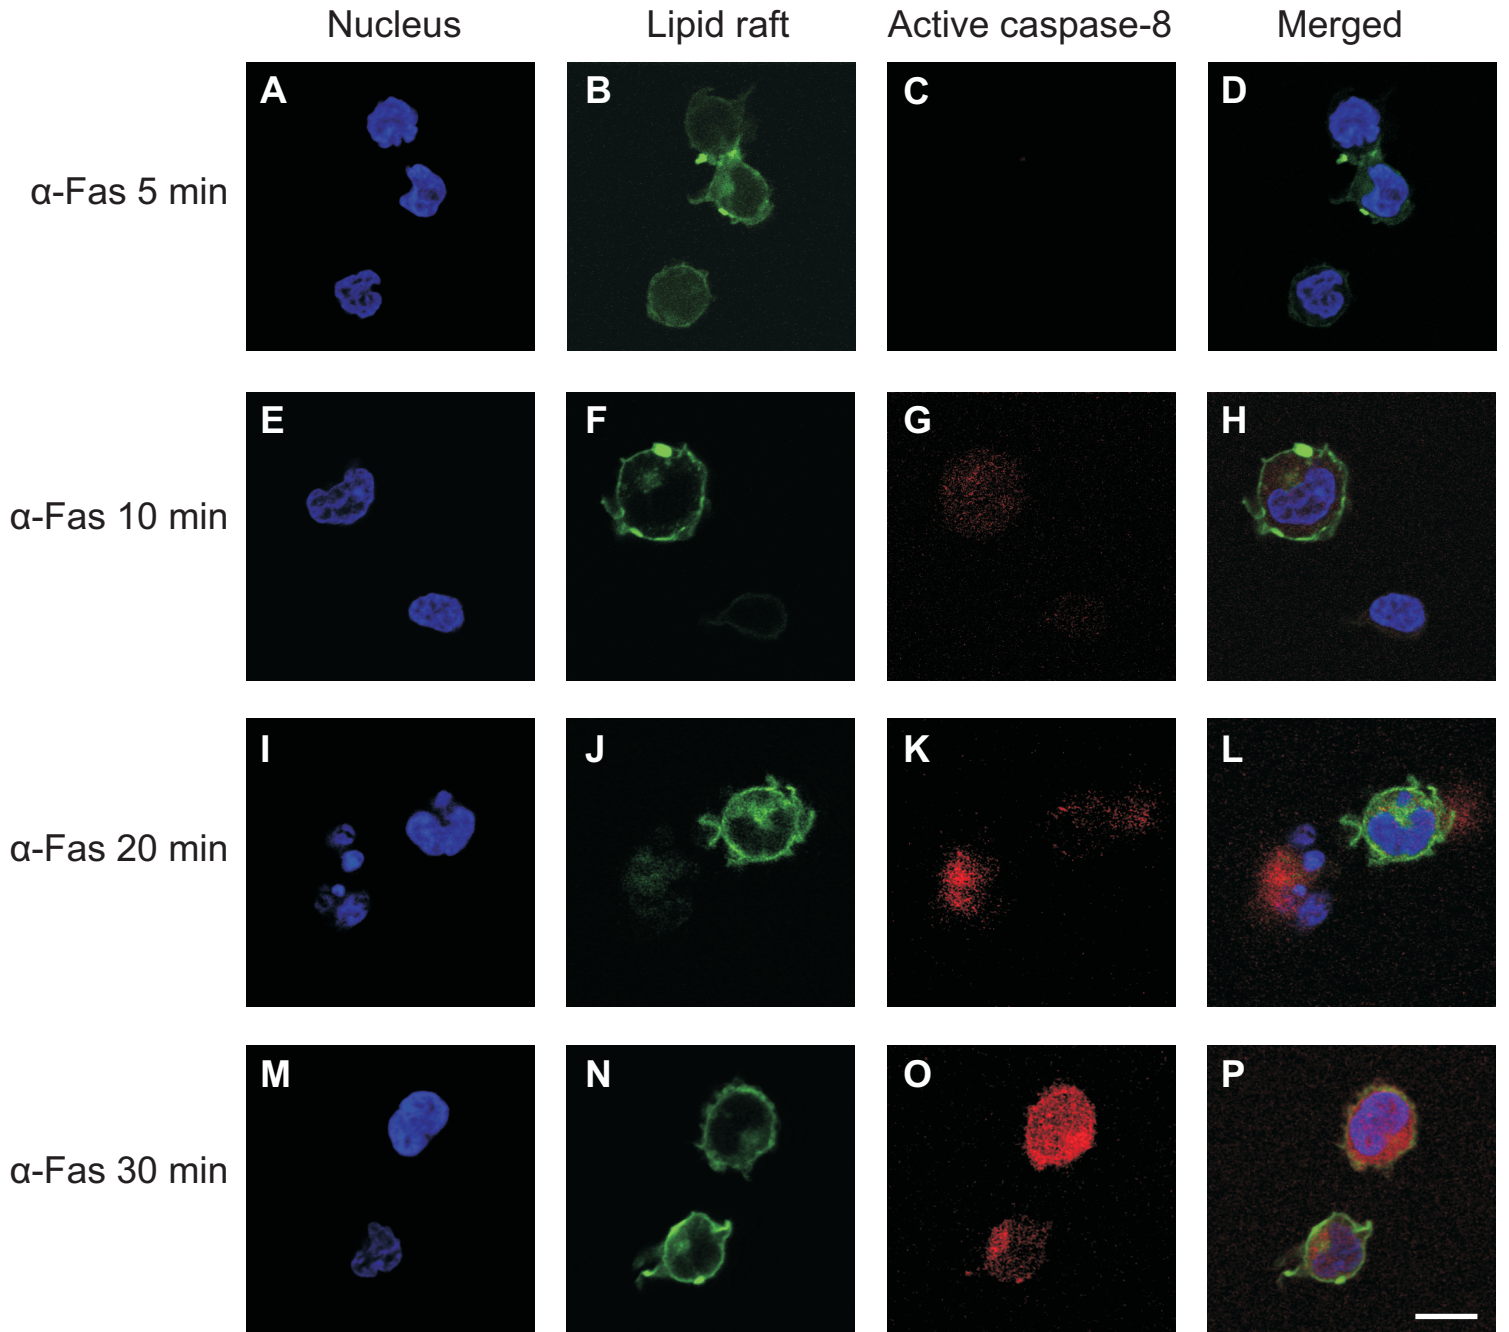

Supplement: NIHMS95263-supplement-Fig_S3.pdf [file NIHMS95263-supplement-Fig_S3.pdf]
